# Supplementary material
Source: Springer Nature journal article supplement (https://www.springermedizin.de/resource/supplementary/12913_2012_2713_MOESM3_ESM.pdf/9531236)

## Men

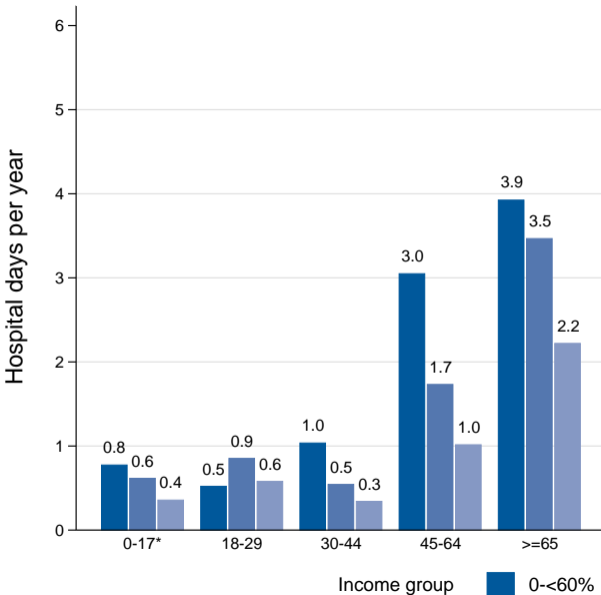

## Women

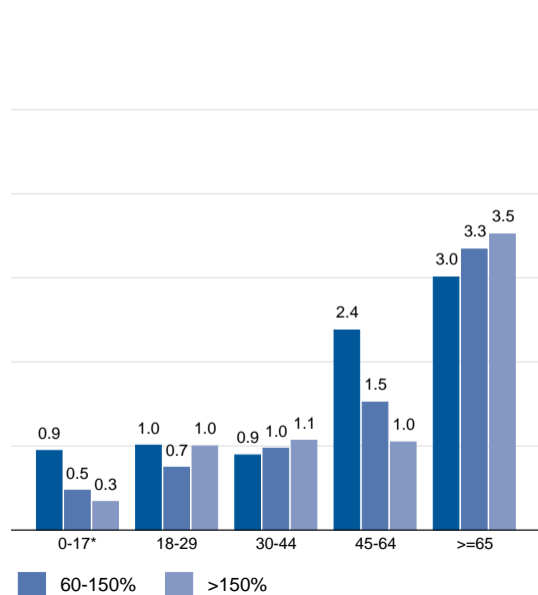

Supplement: MOESM3 [file 9531236]
